# Supplementary material
Source: publisher figshare collection journal article supplement (https://sage.figshare.com/ndownloader/files/13644290)

**Supplemental Figure – Challenges to implementing telementoring**

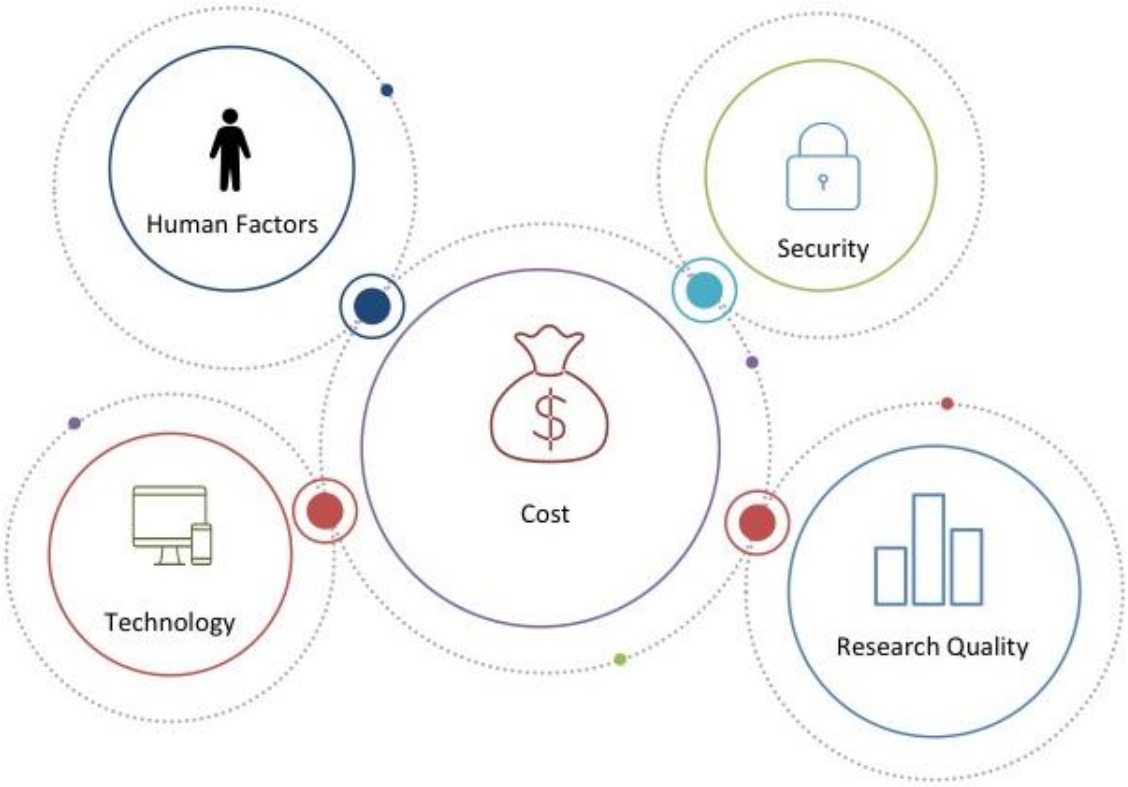

Supplement: Supplementary file 1 [file 13644290]
